# Supplementary material for: A Novel Method of Improving the Mechanical Properties of Propellant Using Energetic Thermoplastic Elastomers with Bonding Groups
Source: MDPI journal article supplement (doi:10.3390/polym16060792), 2024-03-13
Supplement: s1 [file s1]

## Supporting Information

A novel method of improving the mechanical properties of propellant using energetic thermoplastic elastomers with bonding groups

### The Authors:

Shixiong Sun <sup>1,2</sup>, Haoyu Liu <sup>1</sup>, Yang Wang<sup>1</sup>, Wenhao Du <sup>1,2</sup>, Benbo Zhao <sup>1,2,\*</sup> and Yunjun Luo <sup>3,\*</sup>

**Corresponding Author:** Prof. Benbo Zhao; Prof. Yunjun Luo

### Address:

1 School of Chemical Engineering and Technology, North University of China, Taiyuan 030051, China

2 Dezhou Industrial Technology Research Institute of North University of China, Dezhou 253034, China

3 School of Materials Science and Engineering, Beijing Institute of Technology, 5 South Zhongguancun Street, Beijing 100081, China.

**Tel.:** +86-10-3922315; +86-10-68913698

**E-mail:** zhaobenbo@163.com (B. Zhao); yjluo@bit.edu.cn (Y. Luo).

The synthesis process of three kinds GAP-ETPE are as follows:

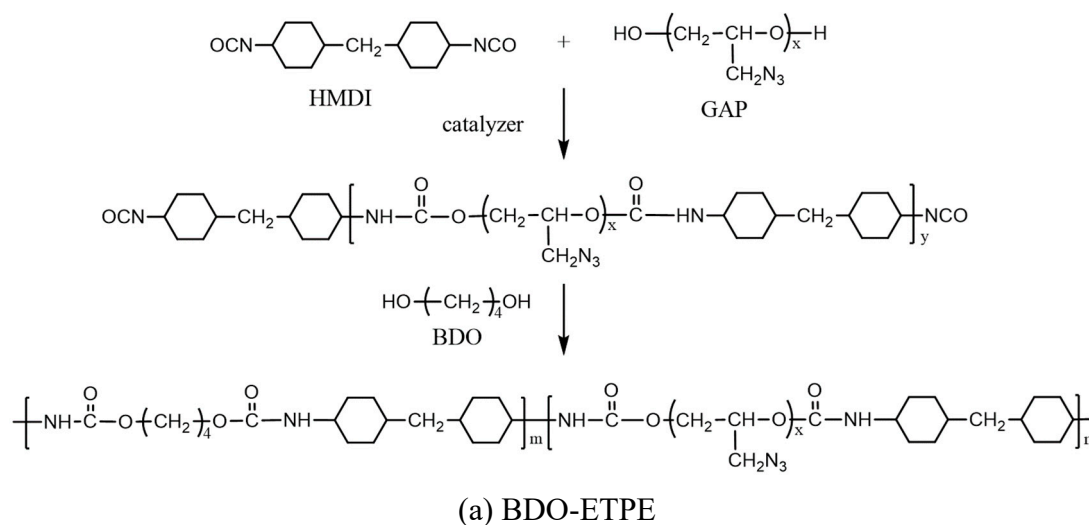

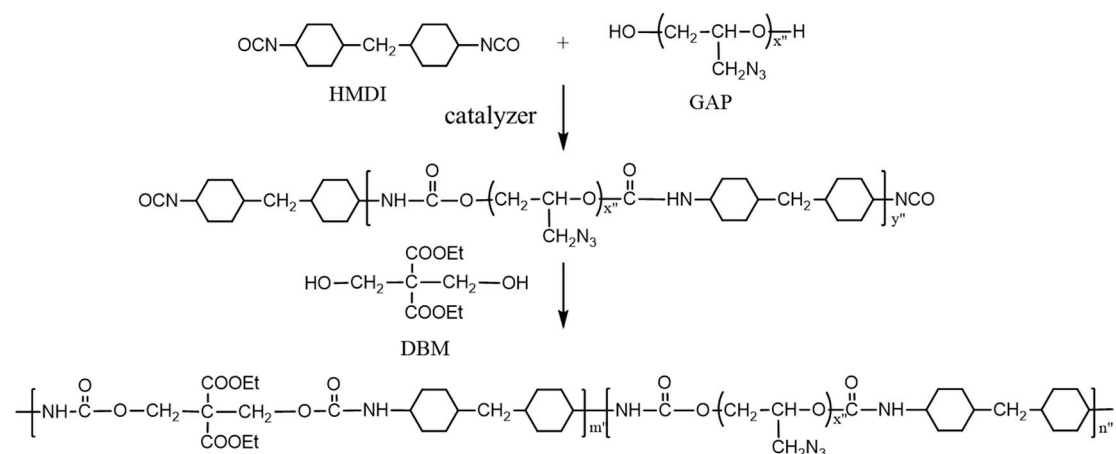

(b) DBM-ETPE

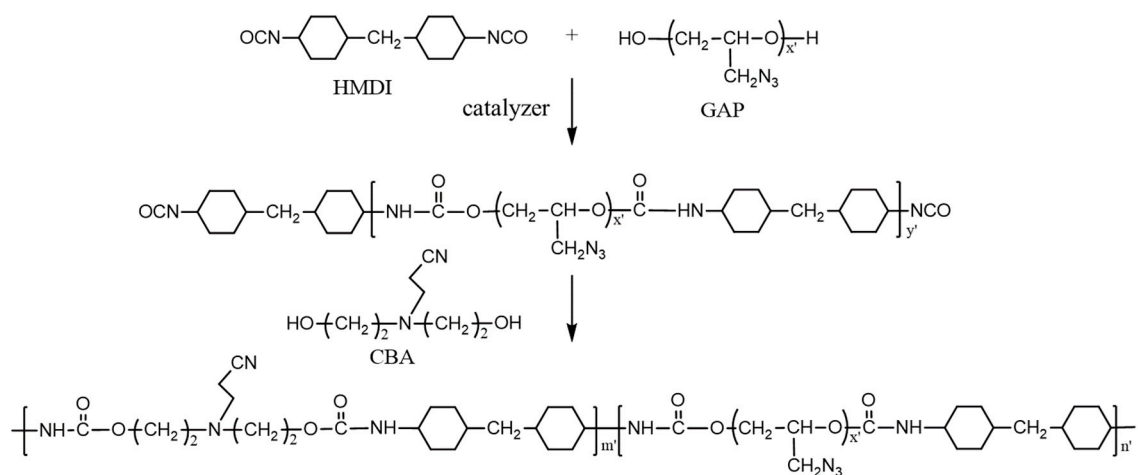

(c) CBA-ETPE

Figure S1. The synthesis process diagram of three kinds GAP-ETPE: (a) BDO-ETPE; (b) DBM-ETPE; (c) CBA-ETPE.

**Table S1.** The tensile properties of EMDB propellants at 50 °C with GAP-ETPE.

| Sample | $\sigma_m/\text{MPa}$ | $\varepsilon_m/\%$ | $\sigma_b/\text{MPa}$ | $\varepsilon_b/\%$ | $\varepsilon_b/\varepsilon_m$ | $E/\text{MPa}$ |
|--------|-----------------------|--------------------|-----------------------|--------------------|-------------------------------|----------------|
| R3     | 1.11                  | 18.86              | 0.96                  | 21.74              | 1.16                          | 14.71          |
| E1B    | 1.09                  | 21.03              | 1.00                  | 23.55              | 1.12                          | 12.96          |
| E2B    | 1.02                  | 22.54              | 0.98                  | 26.60              | 1.18                          | 11.31          |
| E3B    | 0.99                  | 25.34              | 0.98                  | 29.65              | 1.17                          | 9.77           |
| E4B    | 0.88                  | 26.21              | 0.85                  | 30.46              | 1.20                          | 8.39           |
| E5B    | 0.83                  | 25.58              | 0.79                  | 31.21              | 1.22                          | 8.11           |
| E1D    | 1.10                  | 20.93              | 0.89                  | 23.02              | 1.10                          | 13.14          |
| E2D    | 1.10                  | 22.59              | 0.95                  | 24.93              | 1.10                          | 12.17          |

|     |      |       |      |       |      |       |
|-----|------|-------|------|-------|------|-------|
| E3D | 1.04 | 23.13 | 0.82 | 25.54 | 1.10 | 11.24 |
| E4D | 0.90 | 24.90 | 0.76 | 27.10 | 1.08 | 9.04  |
| E5D | 0.85 | 26.01 | 0.73 | 28.09 | 1.08 | 8.17  |
| E1C | 1.10 | 20.68 | 1.06 | 22.65 | 1.09 | 13.30 |
| E2C | 1.17 | 21.21 | 1.04 | 23.47 | 1.10 | 13.79 |
| E3C | 1.19 | 22.08 | 0.94 | 23.75 | 1.08 | 13.47 |
| E4C | 1.04 | 22.50 | 0.88 | 24.28 | 1.08 | 11.56 |
| E5C | 0.95 | 24.39 | 0.84 | 26.58 | 1.09 | 9.74  |

Note:  $\sigma_m$  is the maximum tensile strength;  $\varepsilon_m$  is the elongation at maximum tensile strength;  $\sigma_b$  is the fracture strength;  $\varepsilon_b$  is the fracture elongation. E is the tensile modulus.

**Table S2.** The tensile properties of EMDB propellants at 20 °C with GAP-ETPE.

| Sample | $\sigma_m$ /MPa | $\varepsilon_m$ /% | $\sigma_b$ /MPa | $\varepsilon_b$ /% | $\varepsilon_b/\varepsilon_m$ | $E$ /MPa |
|--------|-----------------|--------------------|-----------------|--------------------|-------------------------------|----------|
| R3     | 5.41            | 9.06               | 3.62            | 9.96               | 1.10                          | 131.3    |
| E1B    | 4.86            | 10.41              | 3.18            | 11.48              | 1.10                          | 102.7    |
| E2B    | 4.65            | 10.61              | 3.13            | 11.79              | 1.11                          | 96.4     |
| E3B    | 4.22            | 12.52              | 3.23            | 13.83              | 1.10                          | 74.1     |
| E4B    | 4.09            | 15.96              | 3.75            | 17.39              | 1.09                          | 56.3     |
| E5B    | 3.69            | 18.56              | 2.97            | 20.12              | 1.08                          | 43.7     |
| E1D    | 5.14            | 9.45               | 4.03            | 10.27              | 1.09                          | 119.6    |
| E2D    | 4.99            | 9.99               | 3.43            | 10.95              | 1.10                          | 109.8    |
| E3D    | 4.67            | 10.19              | 3.99            | 11.27              | 1.10                          | 100.8    |
| E4D    | 4.36            | 11.78              | 3.17            | 13.08              | 1.11                          | 81.43    |
| E5D    | 4.28            | 12.88              | 3.35            | 14.28              | 1.11                          | 73.11    |
| E1C    | 5.33            | 8.82               | 4.42            | 9.91               | 1.12                          | 132.9    |
| E2C    | 5.13            | 9.70               | 3.97            | 10.20              | 1.05                          | 116.3    |
| E3C    | 4.97            | 10.14              | 3.14            | 10.85              | 1.07                          | 107.8    |
| E4C    | 4.84            | 11.79              | 3.28            | 12.88              | 1.09                          | 90.31    |
| E5C    | 4.66            | 12.62              | 3.36            | 13.86              | 1.10                          | 81.24    |

**Table S3.** The tensile properties of EMDB propellants at -40 °C with GAP-ETPE.

| Sample | $\sigma_m$ /MPa | $\varepsilon_m$ /% | $\sigma_b$ /MPa | $\varepsilon_b$ /% | $\varepsilon_b/\varepsilon_m$ | $E$ /MPa |
|--------|-----------------|--------------------|-----------------|--------------------|-------------------------------|----------|
| R3     | 24.98           | 7.08               | 24.98           | 7.09               | 1.00                          | 740.93   |
| E1B    | 24.66           | 7.10               | 24.66           | 7.10               | 1.00                          | 729.38   |
| E2B    | 24.38           | 7.27               | 24.38           | 7.27               | 1.00                          | 704.24   |
| E3B    | 24.03           | 7.42               | 24.03           | 7.42               | 1.00                          | 680.09   |
| E4B    | 23.81           | 7.68               | 23.81           | 7.68               | 1.00                          | 651.05   |
| E5B    | 23.23           | 7.74               | 23.23           | 7.74               | 1.00                          | 630.27   |
| E1D    | 24.59           | 7.08               | 24.59           | 7.08               | 1.00                          | 729.36   |

|     |       |      |       |      |      |        |
|-----|-------|------|-------|------|------|--------|
| E2D | 24.24 | 7.21 | 24.24 | 7.21 | 1.00 | 706.02 |
| E3D | 23.80 | 7.45 | 23.80 | 7.45 | 1.00 | 670.87 |
| E4D | 23.50 | 7.58 | 23.50 | 7.58 | 1.00 | 651.06 |
| E5D | 23.08 | 7.79 | 23.08 | 7.79 | 1.00 | 622.18 |
| E1C | 24.59 | 7.13 | 24.59 | 7.13 | 1.00 | 724.25 |
| E2C | 23.97 | 7.28 | 23.97 | 7.28 | 1.00 | 691.44 |
| E3C | 23.81 | 7.49 | 23.81 | 7.49 | 1.00 | 667.57 |
| E4C | 23.50 | 7.66 | 23.50 | 7.66 | 1.00 | 644.26 |
| E5C | 22.93 | 7.73 | 22.93 | 7.73 | 1.00 | 622.94 |

**Table S4.** The impact strength of EMDB propellants with GAP-ETPE.

| Sample           | Impact strength/kJ·m <sup>-2</sup> |       |       |
|------------------|------------------------------------|-------|-------|
|                  | -40 °C                             | 20 °C | 50 °C |
| Traditional EMDB | 3.54                               | 6.98  | 10.22 |
| R3               | 5.50                               | 9.14  | 16.38 |
| E1B              | 5.71                               | 9.88  | 16.65 |
| E2B              | 5.98                               | 10.54 | 17.14 |
| E3B              | 6.48                               | 12.22 | 18.17 |
| E4B              | 6.79                               | 13.07 | 19.08 |
| E5B              | 7.17                               | 13.84 | -     |
| E1D              | 5.46                               | 10.03 | 17.46 |
| E2D              | 5.94                               | 11.13 | 18.22 |
| E3D              | 6.59                               | 12.41 | 18.92 |
| E4D              | 6.95                               | 13.75 | 21.16 |
| E5D              | 7.33                               | 14.23 | -     |
| E1C              | 5.59                               | 10.44 | 16.68 |
| E2C              | 6.00                               | 10.85 | 19.15 |
| E3C              | 6.58                               | 12.57 | 21.14 |
| E4C              | 6.88                               | 13.61 | 22.30 |
| E5C              | 7.21                               | 14.32 | -     |

**Table S5.** The mechanical sensitivity of EMDB propellants with GAP-ETPE.

| Sample           | H <sub>50</sub> /cm | P/% |
|------------------|---------------------|-----|
| Traditional EMDB | 17.2                | 46  |
| R3               | 32.2                | 0   |
| E1B              | 34.6                | 0   |
| E2B              | 36.7                | 0   |
| E3B              | 39.0                | 0   |
| E4B              | 40.2                | 0   |
| E5B              | 40.6                | 0   |

|     |      |   |
|-----|------|---|
| E1C | 34.4 | 0 |
| E2C | 36.3 | 0 |
| E3C | 38.5 | 0 |
| E4C | 40.0 | 0 |
| E5C | 40.8 | 0 |
| E1D | 34.7 | 0 |
| E2D | 36.5 | 0 |
| E3D | 38.7 | 0 |
| E4D | 40.2 | 0 |
| E5D | 41.0 | 0 |

The interfacial tension and adhesion work between Bu-NENA/NC/GAP-ETPE adhesive system and RDX were calculated due the following formula. Specifically, the interfacial tension between two phases can be expressed as

$$\gamma_{sl} = \gamma_s - \gamma_l \cos \theta \quad (\theta > 0) \quad (1)$$

where  $\theta$  is the contact angle,  $\gamma_s$  is the solid surface tension,  $\gamma_l$  is the liquid surface tension and  $\gamma_{sl}$  is the interfacial tension between the two. In addition, the surface energy ( $\gamma$ ) was made up of a dispersion component ( $d$ ) and a polarity component ( $p$ ), and  $\gamma_{sl}$  can be expressed as the following equation:

$$\begin{aligned} \gamma_{sl} &= \gamma_s + \gamma_l - 2\sqrt{\gamma_s^d}\sqrt{\gamma_l^d} - 2\sqrt{\gamma_s^p}\sqrt{\gamma_l^p} \\ &= (\gamma_s^d + \gamma_s^p) + (\gamma_l^d + \gamma_l^p) - 2\sqrt{\gamma_s^d}\sqrt{\gamma_l^d} - 2\sqrt{\gamma_s^p}\sqrt{\gamma_l^p} \end{aligned} \quad (2)$$

where  $\gamma_s^d$  and  $\gamma_s^p$  are the dispersion and polarity components of the solid, respectively, and  $\gamma_l^d$  and  $\gamma_l^p$  are the dispersion and polarity components of the liquid separately.

Based on Eqns (1) and (2), a new formula can be derived

$$\gamma_l (1 + \cos \theta) / 2\sqrt{\gamma_l^d} = \sqrt{\gamma_s^d} + \sqrt{\gamma_s^p} \times \sqrt{\gamma_l^p} / \sqrt{\gamma_l^d} \quad (3)$$

Then the values of  $\gamma_s^d$ ,  $\gamma_s^p$  and  $\gamma_s$  can be obtained. The interfacial tension ( $\gamma_{s1s2}$ ) and work of adhesion ( $W_a$ ) between the binders and explosives can be calculated using the following equations:

$$\gamma_{s1s2} = \gamma_{s1} + \gamma_{s2} - 2\sqrt{\gamma_{s1}^d}\sqrt{\gamma_{s2}^d} - 2\sqrt{\gamma_{s1}^p}\sqrt{\gamma_{s2}^p} \quad (4)$$

$$W_a = \gamma_{s1} + \gamma_{s2} - \gamma_{s1s2} \quad (5)$$

where  $\gamma_{s1}$  and  $\gamma_{s2}$  represent the surface tensions of solid 1 (s1) and solid 2 (s2) separately,  $\gamma_{s1}^d$  and  $\gamma_{s2}^d$  denote the dispersion component of s1 and s2 separately,  $\gamma_{s1}^p$  and  $\gamma_{s2}^p$  are the polarity component of s1 and s2 separately, and the  $\gamma_{s2}$  of RDX used here was theoretical values.

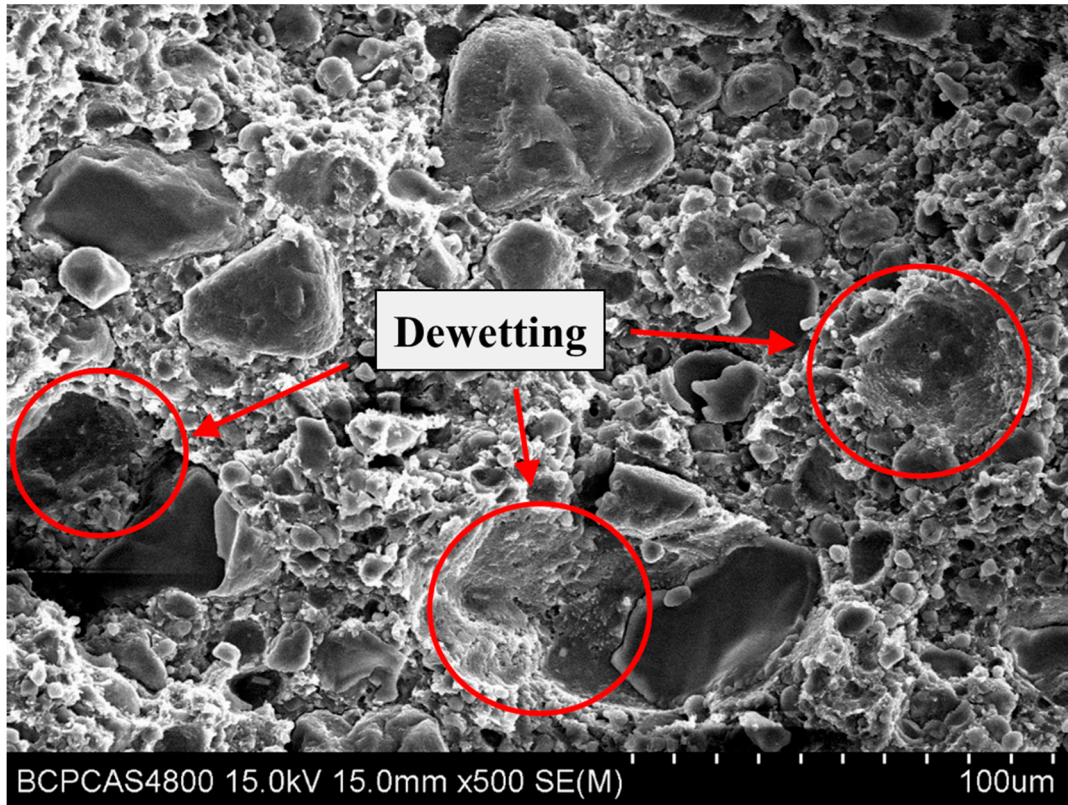

Figure S2. SEM image of cross section R3 propellant at 50°C



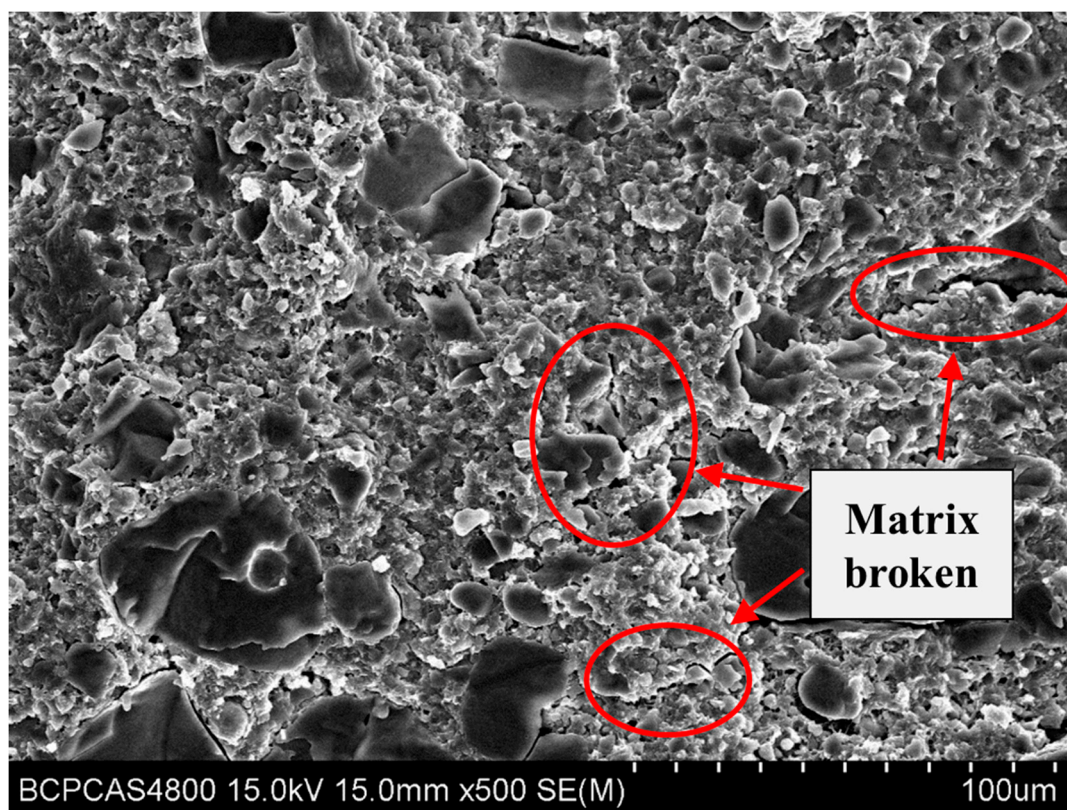

Figure S3. SEM image of cross section R3 propellant at  $-40^{\circ}\text{C}$
